# Supplementary material for: Development of a new methylation‐based fetal fraction estimation assay using multiplex ddPCR
Source: PubMed Central journal article supplement — Mol Genet Genomic Med. 2019 Dec 10;8(2):e1094. doi: 10.1002/mgg3.1094 (PMC7005606; doi:10.1002/mgg3.1094), 2019-12-10
Supplement: MGG3-8-e1094-s001.pdf [file MGG3-8-e1094-s001.pdf]

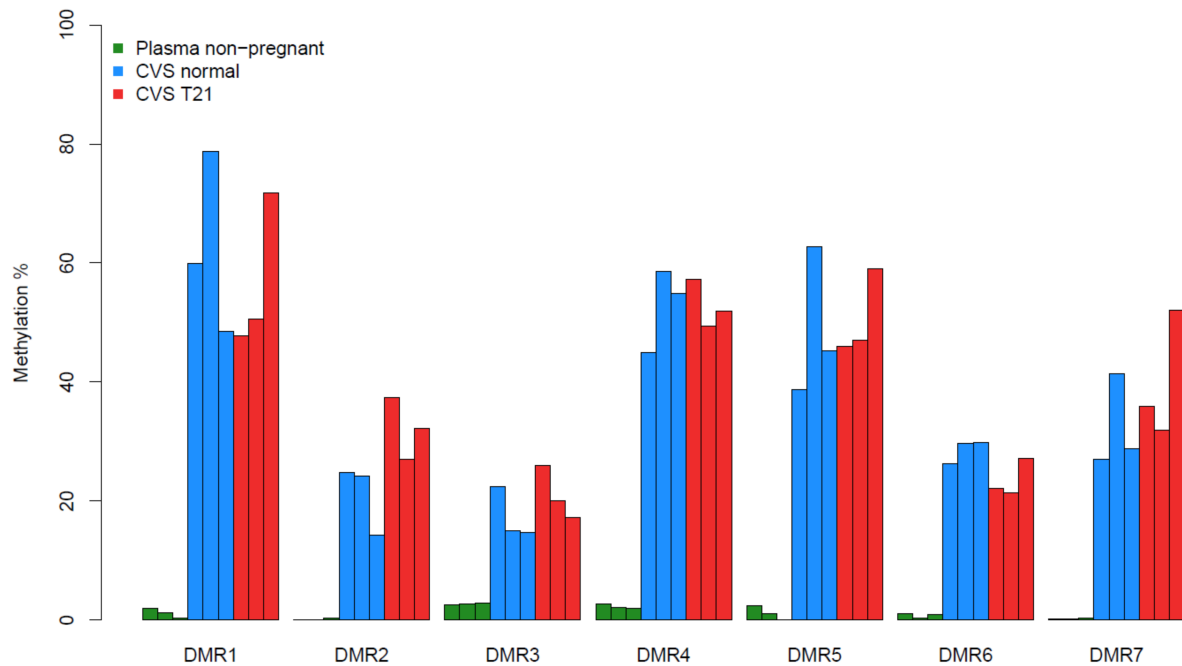

**S1 Fig. Confirmation of the methylation status of selected DMRs in fetal and maternal tissues**

Fetal specific hypermethylation of selected DMRs was confirmed on 3 normal CVS, 3 Trisomy 21 CVS and 3 female non-pregnant plasma samples. In total 38 markers were subjected to ddPCR for confirmation of their methylation status. Seven of them (shown in this figure) showed the highest and consistent methylation difference between CVS (normal and trisomy21) and individual plasma samples.
