# Supplementary material for: Development of a new methylation‐based fetal fraction estimation assay using multiplex ddPCR
Source: PubMed Central journal article supplement — Mol Genet Genomic Med. 2019 Dec 10;8(2):e1094. doi: 10.1002/mgg3.1094 (PMC7005606; doi:10.1002/mgg3.1094), 2019-12-10
Supplement: MGG3-8-e1094-s002.pdf [file MGG3-8-e1094-s002.pdf]

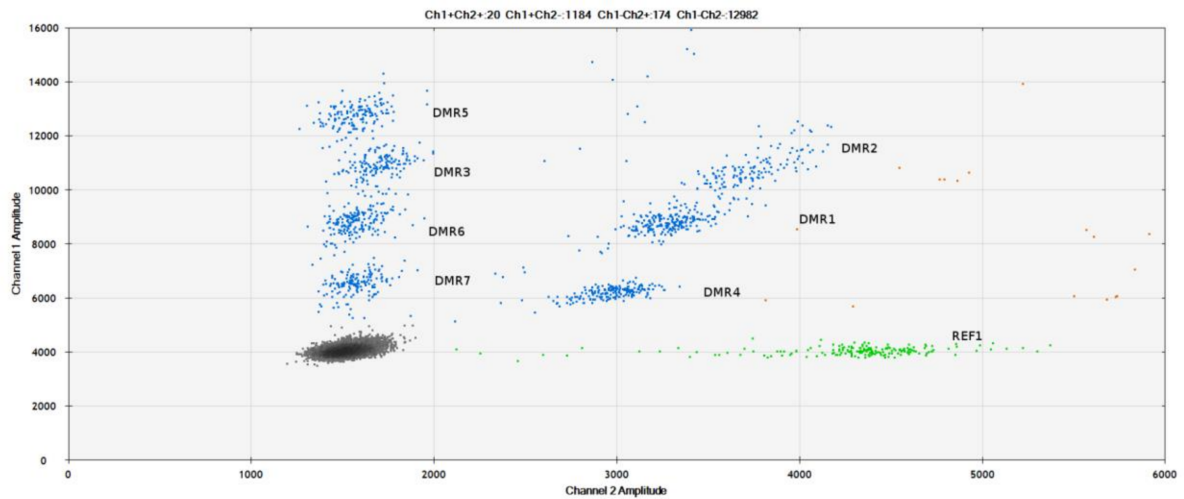

## S2 Fig. Multiplex ddPCR targeting selected DMRs

Eight markers (DMR 1-7 and REF1) were combined at different ratios of FAM and HEX fluorophores in a single ddPCR reaction. Two-dimension droplet plot shows distinct cluster populations for each tested DMR used for the fetal fraction estimation model.
