# Supplementary material for: Development of a new methylation‐based fetal fraction estimation assay using multiplex ddPCR
Source: PubMed Central journal article supplement — Mol Genet Genomic Med. 2019 Dec 10;8(2):e1094. doi: 10.1002/mgg3.1094 (PMC7005606; doi:10.1002/mgg3.1094), 2019-12-10
Supplement: MGG3-8-e1094-s003.pdf [file MGG3-8-e1094-s003.pdf]

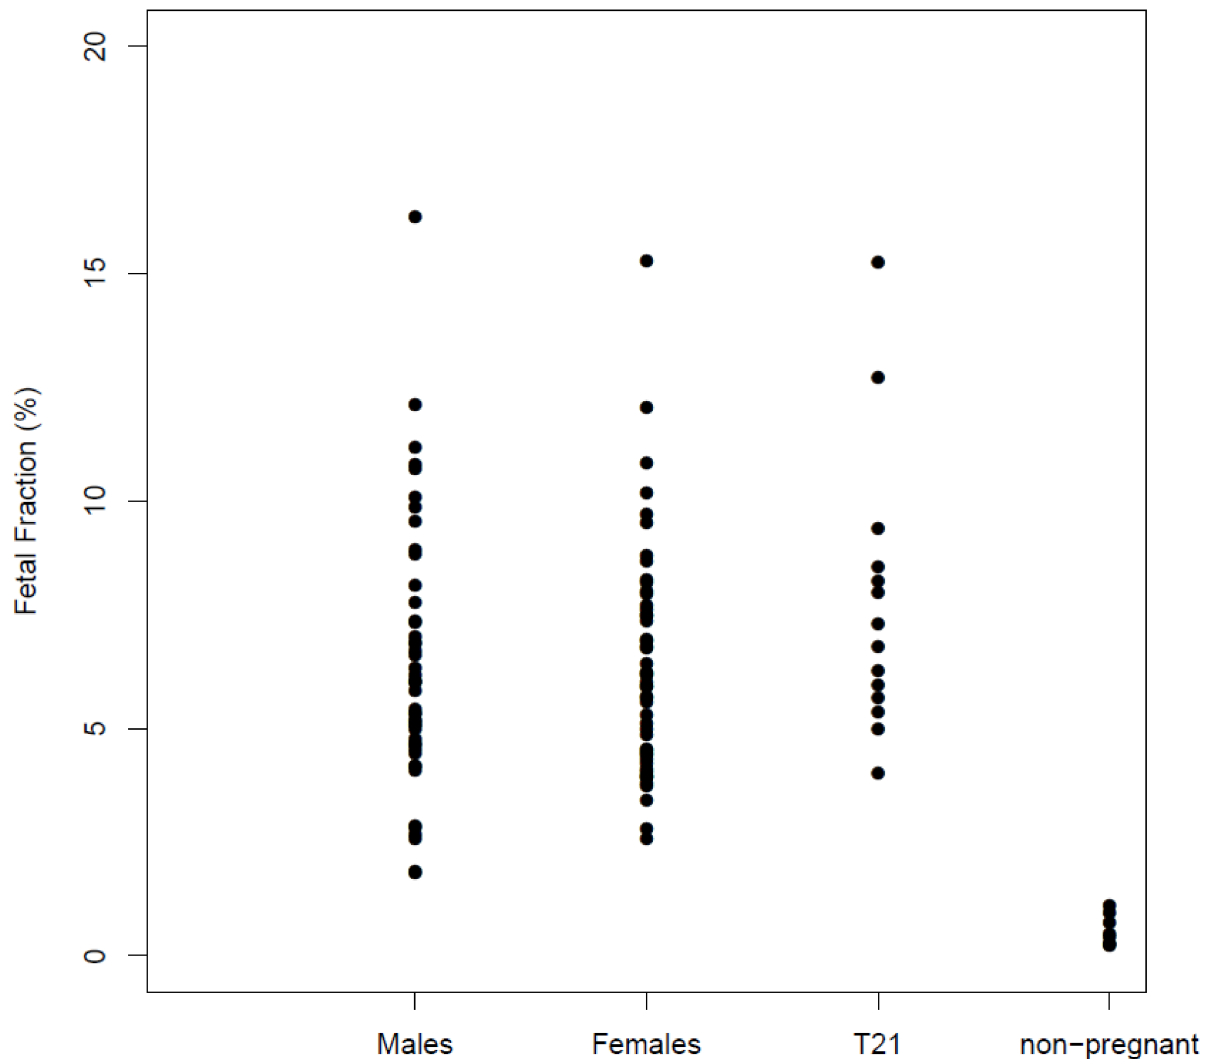

**Fig 3. Comparison between male and female pregnancies and aneuploidy samples**

The performance of the assay was evaluated using 123 samples including 51 female and 58 male euploid samples and 14 trisomy 21 samples. The performance between male (n=51) and female (n=59) pregnancy samples did not differ (p-value=0.97; Wilcoxon test). The fetal fraction estimation accuracy was further assessed on 14 trisomy 21 samples showing comparable performance to the euploid male samples (p-value=0.13; Wilcoxon test). The maternal background (noise) level at very low fetal fractions was assessed using 8 non-pregnant samples. The estimated fetal fractions ranged from 0.2% to 1.09%.
